# Supplementary material
Source: PubMed Central journal article supplement (PMC6883837)

Supplementary Table 1. Descriptive Information on LPA Indicators: Overall and Group Differences

|                           | Total sample<br>( <i>N</i> =187) | HG<br>(66.8%; <i>n</i> =125) | PSYG<br>(17.1%; <i>n</i> =32) | PHSG<br>(16%; <i>n</i> =30) | <i>F</i>                                   | #<br>Missing |
|---------------------------|----------------------------------|------------------------------|-------------------------------|-----------------------------|--------------------------------------------|--------------|
| Maternal age              | 29.64 (6.24)                     | 30.00 (6.23)                 | 28.49 (6.46)                  | 29.39 (6.09)                | <i>F</i> (2,184) = 0.77                    | 0            |
| Pre-pregnancy BMI         | 26.09 (5.80)                     | 25.53 (5.32)                 | 28.55 (7.45)                  | 25.73 (5.20)                | <i>F</i> (2,180) = 3.60* <sup>a</sup>      | 4            |
| Day: Systolic BP          | 112.80 (7.32)                    | 110.71 (5.80)                | 112.12 (6.54)                 | 120.96 (7.57)               | <i>F</i> (2,103) = 19.94*** <sup>b,c</sup> | 81           |
| Day: Diastolic BP         | 81.51 (5.19)                     | 80.06 (4.46)                 | 80.92 (4.12)                  | 87.30 (4.78)                | <i>F</i> (2,103) = 19.77*** <sup>b,c</sup> | 81           |
| Day: Heart Rate           | 86.87 (6.17)                     | 86.44 (6.30)                 | 88.66 (6.18)                  | 86.62 (5.66)                | <i>F</i> (2,103) = 0.99                    | 81           |
| Day: MAP                  | 66.65 (5.35)                     | 65.37 (4.99)                 | 65.80 (4.11)                  | 72.06 (4.45)                | <i>F</i> (2,103) = 15.08*** <sup>b,c</sup> | 81           |
| Night: Systolic BP        | 105.25 (9.32)                    | 101.97 (5.85)                | 101.65 (5.52)                 | 120.13 (7.41)               | <i>F</i> (2,95) = 65.55*** <sup>b,c</sup>  | 89           |
| Night: Diastolic BP       | 74.51 (7.05)                     | 72.20 (4.36)                 | 71.38 (4.84)                  | 85.55 (5.80)                | <i>F</i> (2,95) = 60.35*** <sup>b,c</sup>  | 89           |
| Night: Heart Rate         | 80.87 (6.87)                     | 80.44 (6.51)                 | 81.94 (7.39)                  | 81.28 (7.78)                | <i>F</i> (2,92) = 0.35                     | 92           |
| Night: MAP                | 59.20 (7.50)                     | 57.02 (4.73)                 | 55.75 (5.88)                  | 70.06 (7.22) <sup>a</sup>   | <i>F</i> (2,95) = 44.13*** <sup>b,c</sup>  | 89           |
| Diurnal cortisol<br>(log) | -0.10 (0.15)                     | -0.11 (0.16)                 | -0.10 (0.11)                  | -0.05 (0.11)                | <i>F</i> (2,70) = 1.07                     | 114          |
| Kcals total               | 2153.04 (875.89)                 | 1968.25 (784.65)             | 2240.32<br>(462.75)           | 2665.85<br>(1202.53)        | <i>F</i> (2,99) = 5.37** <sup>b</sup>      | 85           |
| Kcals protein             | 93.09 (41.40)                    | 83.57 (35.85)                | 100.34 (31.60)                | 117.04 (54.74)              | <i>F</i> (2,99) = 5.82** <sup>b</sup>      | 85           |

|                       |                 |                 |                |                 |                              |    |
|-----------------------|-----------------|-----------------|----------------|-----------------|------------------------------|----|
| Kcals fat             | 81.66 (44.62)   | 72.88 (40.13)   | 85.67 (38.28)  | 106.14 (55.01)  | $F(2,99) = 4.63^{*b}$        | 85 |
| Kcals carb            | 267.74 (108.91) | 250.57 (101.71) | 274.34 (87.49) | 316.75 (135.41) | $F(2,99) = 2.96$             | 85 |
| Kcals added sugar     | 113.85 (62.16)  | 101.75 (54.55)  | 128.61 (70.68) | 139.27 (69.44)  | $F(2,99) = 3.57^{*b}$        | 85 |
| Average activity      | 0.60 (0.37)     | 0.57 (0.34)     | 0.70 (0.43)    | 0.56 (0.40)     | $F(2,96) = 1.06$             | 88 |
| PSS                   | 22.35 (8.13)    | 19.86 (7.49)    | 28.79 (7.26)   | 25.05 (7.13)    | $F(2,109) = 12.70^{***a,b}$  | 75 |
| PES happy             | 60.62 (22.47)   | 63.57 (23.07)   | 53.17 (20.92)  | 58.37 (20.52)   | $F(2,156) = 2.71$            | 28 |
| PES unhappy           | 20.75 (14.36)   | 18.46 (13.34)   | 31.47 (15.93)  | 17.60 (11.00)   | $F(2,156) = 11.74^{***a,c}$  | 28 |
| PDA negative mood     | 0.34 (0.37)     | 0.20 (0.20)     | 0.73 (0.47)    | 0.40 (0.41)     | $F(2,96) = 21.40^{***a,b,c}$ | 88 |
| Ham-D                 | 7.51 (6.27)     | 5.46 (4.16)     | 15.53 (7.50)   | 6.14 (4.02)     | $F(2,107) = 34.43^{***a,c}$  | 77 |
| Ham-A                 | 6.64 (5.74)     | 4.99 (3.87)     | 13.00 (7.94)   | 5.62 (3.63)     | $F(2,107) = 22.38^{***a,c}$  | 77 |
| PTSD Index            | 4.55 (5.86)     | 2.89 (4.35)     | 9.60 (7.80)    | 4.09 (4.25)     | $F(2,114) = 15.14^{***a,c}$  | 70 |
| ISEL appraisal        | 25.73 (5.16)    | 28.04 (2.44)    | 17.59 (5.49)   | 25.73 (3.46)    | $F(2,158) = 108.84^{***}$    | 26 |
|                       |                 |                 |                |                 | a,b,c                        |    |
| ISEL belonging        | 24.30 (5.03)    | 26.55 (3.25)    | 16.90 (3.89)   | 23.83 (3.91)    | $F(2,158) = 86.26^{***}$     | 26 |
|                       |                 |                 |                |                 | a,b,c                        |    |
| ISEL tangible support | 23.65 (5.25)    | 26.05 (3.64)    | 16.66 (4.10)   | 22.27 (4.27)    | $F(2,158) = 69.63^{***}$     | 26 |
|                       |                 |                 |                |                 | a,b,c                        |    |

---

Note: \* $p < .05$ , \*\* $p < .01$ , \*\*\* $p < .001$ . HG = healthy group; PSYG = psychologically stressed group; PHSG = physically stressed group; BMI = body mass index; BP = blood pressure; MAP = mean arterial pressure; Kcals = calories; PSS = Perceived Stress Scale; PES = Pregnancy Experiences Scale; PDA = Personal Digital Assistant; Ham-D = Hamilton Depression Scale; HAM-A = Hamilton Anxiety Scale; PTSD Index = Posttraumatic Stress Disorder Index; ISEL = Interpersonal Support Evaluation List; <sup>a</sup>=PSYG vs. HG; <sup>b</sup>=PHSG vs. HG; <sup>c</sup>=PSYG vs. PHSG are significant at  $p < 0.05$  based on Least Significant Differences (LSD).

Supplementary Table 2. Fetal Sex, Birth Outcomes, and Fetal Neurobehavior by Stress Group

|                                              | Total sample     | HG                  | PSYG                | PHSG                | $F/\chi^2$                  | Sex  | #       |
|----------------------------------------------|------------------|---------------------|---------------------|---------------------|-----------------------------|------|---------|
|                                              | (N = 187)        | (66.8%; n = 125)    | (17.1%; n = 32)     | (16%; n = 30)       |                             | Int. | Missing |
| <b>Fetal sex</b>                             |                  |                     |                     |                     | $\chi^2(2) = 6.87^{*b}$     | --   | 8       |
| Male % (n)                                   | 49.7 (89)        | 56.1 (69)           | 40.0 (12)           | 30.8 (8)            |                             |      |         |
| Female % (n)                                 | 50.3 (90)        | 43.9 (54)           | 60.0 (18)           | 69.2 (18)           |                             |      |         |
| <b>Birth outcomes</b>                        |                  |                     |                     |                     |                             |      |         |
| GA at birth $M$<br>( $SD$ ), weeks           | 38.74 (3.16)     | 39.13 (2.05)        | 38.18 (4.71)        | 37.60 (4.56)        | $F(2,179) =$<br>$3.27^{*b}$ | N    | 5       |
| Preterm birth, %<br>(n)                      | 8.2 (15)         | 4.9 (6)             | 9.4 (3)             | 22.2 (6)            | $\chi^2(2) = 8.87^{**b}$    | N    | 5       |
| Birth weight <sup>a</sup> $M$<br>( $SD$ ), g | 3319.40 (510.15) | 3297.16<br>(470.53) | 3382.68<br>(637.78) | 3354.93<br>(547.54) | $F(2,167) =$<br>0.38        | N    | 17      |
| Delivery type %<br>(n)                       |                  |                     |                     |                     | $\chi^2(4) = 6.90$          | N    | 25      |
| Vaginal                                      | 61.1 (99)        | 60.2 (68)           | 65.4 (17)           | 60.9 (14)           |                             |      |         |
| Assisted vaginal                             | 3.7 (6)          | 2.7 (3)             | 11.5 (3)            | 0 (0)               |                             |      |         |
| Cesarian                                     | 35.2 (57)        | 37.2 (42)           | 23.1 (6)            | 39.1 (9)            |                             |      |         |

|                                                   |              |              |              |             |                         |                 |     |
|---------------------------------------------------|--------------|--------------|--------------|-------------|-------------------------|-----------------|-----|
| Complications                                     | 37.6 (68)    | 35.8 (44)    | 54.8 (17)    | 25.9 (7)    | $\chi^2(2) = 5.67^{*c}$ | N               | 6   |
| NICU involvement (y)                              | 4.0 (6)      | 3.0 (3)      | 7.4 (2)      | 4.5 (1)     | $\chi^2(2) = 1.09$      | NA <sup>d</sup> | 38  |
| Baby length of stay, <i>M</i> ( <i>SD</i> ), days | 2.87 (1.12)  | 2.74 (0.86)  | 3.44 (2.00)  | 2.85 (0.88) | $F(2,105) = 2.61^{*a}$  | N               | 79  |
| Mom length of stay, <i>M</i> ( <i>SD</i> ), days  | 3.21 (3.55)  | 3.32 (4.31)  | 2.89 (0.74)  | 3.05 (0.95) | $F(2,120) = 0.14$       | N               | 64  |
| <b>Fetal neuro-behavior</b>                       |              |              |              |             |                         |                 |     |
| FHR movement coupling <i>M</i> ( <i>SD</i> )      | 0.53 (0.13)  | 0.56 (0.12)  | 0.52 (0.13)  | 0.45 (0.14) | $F(2,84) = 4.92^{**b}$  | N               | 100 |
| HR reactivity <i>M</i> ( <i>SD</i> ), bpm         | -0.93 (5.82) | -1.25 (5.49) | -1.25 (5.95) | 1.29 (7.27) | $F(2,118) = 1.25$       | Y               | 66  |

\* $p < .05$ , \*\* $p < .01$ , \*\*\* $p < .001$ . HG = healthy group; PSYG = psychologically stressed group; PHSG = physically stressed group; Identical superscripts within a row indicate significant differences based on Least Significant Differences (LSD) for continuous variables or Fisher's exact test for categorical variables; a=PSYG vs. HG; b=PHSG vs. HG; c=PSYG vs. PHSG; FHR = fetal heart rate; HR = heart rate; ^raw estimates are presented here but analyses were also conducted with birth weight corrected for gestational age by using the residuals from a regression model predicting birth weight from gestational age at birth as the dependent variable; NICU = neonatal intensive care unit; Sex Int. = Significant group by sex interaction; Y/N = yes/no based on  $p < 0.05$ ; <sup>d</sup>the logistic regression with sex interaction did not converge due to low prevalence of NICU involvement.

Supplementary Table 3. Sensitivity Analysis Removing 12 Women with Prenatal Physical Health Conditions

|                                | Total sample<br>(N = 175) | HG<br>(68%; n = 119) | PSYG<br>(16.6%; n = 29) | PHSG<br>(15.4%; n = 27) | $F/\chi^2$              |
|--------------------------------|---------------------------|----------------------|-------------------------|-------------------------|-------------------------|
| <b>Fetal sex</b>               |                           |                      |                         |                         | $\chi^2(2) = 7.51^{*b}$ |
| Male % (n)                     | 50.3 (84)                 | 56.4 (66)            | 44.4 (12)               | 26.1 (6)                |                         |
| Female % (n)                   | 49.7 (83)                 | 43.6 (51)            | 65.6 (15)               | 73.9 (17)               |                         |
| <b>Birth outcomes</b>          |                           |                      |                         |                         |                         |
| GA at birth $M$ (SD), weeks    | 38.73 (3.25)              | 39.11 (2.09)         | 38.11 (4.95)            | 37.60 (4.82)            | $F(2,169) = 2.87^{+b}$  |
| Preterm birth, % (n)           | 8.2 (14)                  | 5.1 (6)              | 10.3 (3)                | 20.8 (5)                | $\chi^2(2) = 6.71^{*b}$ |
| <b>Fetal neuro-behavior</b>    |                           |                      |                         |                         |                         |
| FHR movement coupling $M$ (SD) | 0.53 (0.14)               | 0.55 (0.14)          | 0.52 (0.13)             | 0.46 (0.13)             | $F(2,82) = 2.40^{+b}$   |

\* $p < 0.05$ , + $p < 0.10$

Supplementary Table 4. Regression Analyses Predicting Baby Sex, Preterm Birth, Gestational Age at Birth, and Fetal Heart Rate-Fetal Movement Coupling Controlling for the Composite Social Support score

| Outcome variable                         | Predictors                                        | Odds Ratios/ $\beta$ | CI            | p     |    |
|------------------------------------------|---------------------------------------------------|----------------------|---------------|-------|----|
| Baby sex                                 | Psychologically stressed (vs. Healthy)            | 1.19                 | 0.29 – 4.88   | 0.808 |    |
|                                          | Physically stressed (vs. Healthy)                 | 2.55                 | 0.96 – 6.77   | 0.061 |    |
|                                          | Physically stressed(vs. Psychologically stressed) | 2.14                 | 0.53 – 8.57   | 0.283 |    |
|                                          | Social support                                    | 0.98                 | 0.94 – 1.02   | 0.348 |    |
| Preterm birth                            | Psychologically stressed (vs. Healthy)            | 0.79                 | 0.07 – 8.46   | 0.848 |    |
|                                          | Physically stressed (vs. Healthy)                 | 4.07                 | 1.03 – 16.09  | 0.045 | *  |
|                                          | Physically stressed(vs. Psychologically stressed) | 5.13                 | 0.68 – 38.57  | 0.112 |    |
|                                          | Social support                                    | 0.97                 | 0.91 – 1.03   | 0.262 |    |
| GA at birth                              | Psychologically stressed (vs. Healthy)            | 0.85                 | -1.25 – 2.95  | 0.430 |    |
|                                          | Physically stressed (vs. Healthy)                 | -1.06                | -2.46 – 0.33  | 0.136 |    |
|                                          | Physically stressed(vs. Psychologically stressed) | -1.91                | -3.90 – 0.08  | 0.062 |    |
|                                          | Social support                                    | 0.07                 | 0.01 – 0.12   | 0.023 | *  |
| Fetal heart rate-fetal movement coupling | Psychologically stressed (vs. Healthy)            | -0.08                | -0.18 – 0.03  | 0.160 |    |
|                                          | Physically stressed (vs. Healthy)                 | -0.11                | -0.18 – -0.04 | 0.003 | ** |
|                                          | Physically stressed(vs. Psychologically stressed) | -0.04                | -0.14 – 0.06  | 0.484 |    |
|                                          | Social support                                    | 0                    | -0.00 – 0.00  | 0.493 |    |

\* $p < 0.05$ , \*\* $p < 0.01$

Supplementary Table 5. Social Determinants of Health Associated with Stress Group Membership

|                                             | Total sample<br>(N = 187) | HG<br>(66.8%; n=125) | PSYG<br>(17.1%; n = 32) | PHSG<br>(16%; n =30) | $F/\chi^2$                    | #<br><i>Missing</i> |
|---------------------------------------------|---------------------------|----------------------|-------------------------|----------------------|-------------------------------|---------------------|
| Hispanic ethnicity % (n)                    | 69.7 (129)                | 63.4 (78)            | 90.6 (29)               | 73.3 (22)            | $\chi^2(2) = 9.13^{**a}$      | 2                   |
| Education (years) <i>M</i><br>( <i>SD</i> ) | 14.87 (3.08)              | 15.20 (3.02)         | 13.39 (2.00)            | 15.12 (3.83)         | $F(2,183) = 4.66^{**}$<br>a,c | 1                   |
| Household income % (n)                      |                           |                      |                         |                      | $\chi^2(6) = 30.12^{***a,c}$  | 0                   |
| <\$15,000                                   | 14.4 (27)                 | 9.6 (12)             | 40.6 (13)               | 6.7 (2)              |                               |                     |
| \$16,000-\$50,000                           | 41.2 (77)                 | 37.6 (47)            | 40.6 (13)               | 56.7 (17)            |                               |                     |
| \$51,000-\$100,000                          | 25.1 (47)                 | 28.0 (35)            | 18.8 (6)                | 20.0 (6)             |                               |                     |
| >\$100,000                                  | 19.3 (36)                 | 24.8 (31)            | 0.0 (0)                 | 16.7 (5)             |                               |                     |
| Medicaid (yes) %(n)                         | 50.5 (93)                 | 42.3 (52)            | 77.4 (24)               | 56.7 (17)            | $\chi^2(2) = 12.77^{***a}$    | 3                   |
| WIC (yes) % (n)                             | 43.3 (81)                 | 36.0 (45)            | 71.9 (23)               | 43.3 (13)            | $\chi^2(2) = 13.35^{***a,c}$  | 0                   |
| Other public assistance<br>% (n)            | 25.1 (46)                 | 19.7 (24)            | 46.9 (15)               | 24.1 (7)             | $\chi^2(2) = 9.99^{**a}$      | 4                   |
| Baby's father involved<br>(yes) % (n)       | 94.8 (163)                | 95.7 (112)           | 89.7 (26)               | 96.2 (25)            | $\chi^2(2) = 1.85$            | 15                  |

|                                           |             |             |              |             |                                       |    |
|-------------------------------------------|-------------|-------------|--------------|-------------|---------------------------------------|----|
| First pregnancy (yes) %<br>(n)            | 24.6 (46)   | 24.0 (30)   | 21.9 (7)     | 30.0 (9)    | $\chi^2(2) = 0.62$                    | 0  |
| Number of prior pregnancies <i>M (SD)</i> | 2.01 (2.09) | 1.74 (1.74) | 2.97 (2.90)  | 2.07 (2.17) | $F(2,182) = 4.56^{**\text{ a}}$       | 2  |
| Number of children <i>M (SD)</i>          | 0.84 (0.94) | 0.80 (0.95) | 1.19 (1.03)  | 0.61 (0.69) | $F(2,180) = 3.25^{*\text{ a,c}}$      | 4  |
| Number of miscarriages <i>M (SD)</i>      | 0.61 (0.95) | 0.55 (0.89) | 0.77 (1.09)  | 0.66 (1.04) | $F(2,178) = 0.7$                      | 6  |
| Number of abortions <i>M (SD)</i>         | 0.62 (1.16) | 0.45 (0.78) | 1.06 (1.79)  | 0.82 (1.49) | $F(2,173) = 4.01^{***\text{ a}}$      | 11 |
| Childhood Trauma <i>M (SD)</i>            |             |             |              |             |                                       |    |
| Emotional abuse                           | 7.78 (3.77) | 7.17 (3.15) | 10.29 (4.74) | 7.21 (3.63) | $F(2,158) = 9.42^{***\text{ a,c}}$    | 26 |
| Sexual abuse                              | 6.57 (3.83) | 6.50 (3.92) | 7.13 (4.38)  | 6.21 (2.82) | $F(2,155) = 0.47$                     | 29 |
| Physical abuse                            | 6.66 (2.83) | 6.44 (2.88) | 7.42 (2.95)  | 6.59 (2.44) | $F(2,157) = 1.44$                     | 27 |
| Emotional neglect                         | 8.97 (4.51) | 7.57(3.05)  | 13.03 (5.29) | 9.48 (5.24) | $F(2,158) = 22.24^{***\text{ a,b,c}}$ | 26 |

|                        |              |              |               |              |                              |    |
|------------------------|--------------|--------------|---------------|--------------|------------------------------|----|
| Physical neglect       | 6.11 (2.23)  | 5.58 (1.61)  | 7.83 (3.35)   | 6.14 (1.75)  | $F(2,157) = 13.71^{***}$ a,c | 27 |
| Parental Bonding Index |              |              |               |              |                              |    |
| <i>M (SD)</i>          |              |              |               |              |                              |    |
| Mother: care           | 27.72 (8.61) | 29.48 (7.05) | 21.90 (9.82)  | 27.40 (9.92) | $F(2,166) = 10.41^{***}$ a,c | 18 |
| Mother: overprotection | 14.22 (7.54) | 13.23 (7.17) | 17.87 (9.03)  | 14.00 (6.13) | $F(2,166) = 4.78^{**}$ a,c   | 18 |
| Father: care           | 25.97 (9.07) | 27.76 (7.88) | 18.54 (10.94) | 26.42 (7.80) | $F(2,150) = 12.34^{***}$ a,c | 34 |
| Father: overprotection | 13.35 (7.36) | 12.51 (7.28) | 15.77 (7.54)  | 14.19 (7.14) | $F(2,150) = 2.26^{*}$ a      | 34 |

---

\* $p < .05$ , \*\* $p < .01$ , \*\*\* $p < .001$ . HG = healthy group; PSYG = psychologically stressed group; PHSG = physically stressed group; Superscripts within a row indicate significant differences based on Least Significant Differences (LSD) for continuous variables or Fisher's exact test for categorical variables; a=PSYG vs. HG; b=PHSG vs. HG; c=PSYG vs. PHSG; WIC = Women Infant Children

Supplementary Figure 1. Chi square differences in complications (%) by maternal stress groups ( $*p < 0.05$ ) with standard error bars are presented for all participants ( $n = 181$ ) on the left and by fetal sex ( $n = 175$ ) on the right. Complications included any pre-, peri-, or postnatal reports of infection, preeclampsia, vascular problems, or diabetes mellitus.

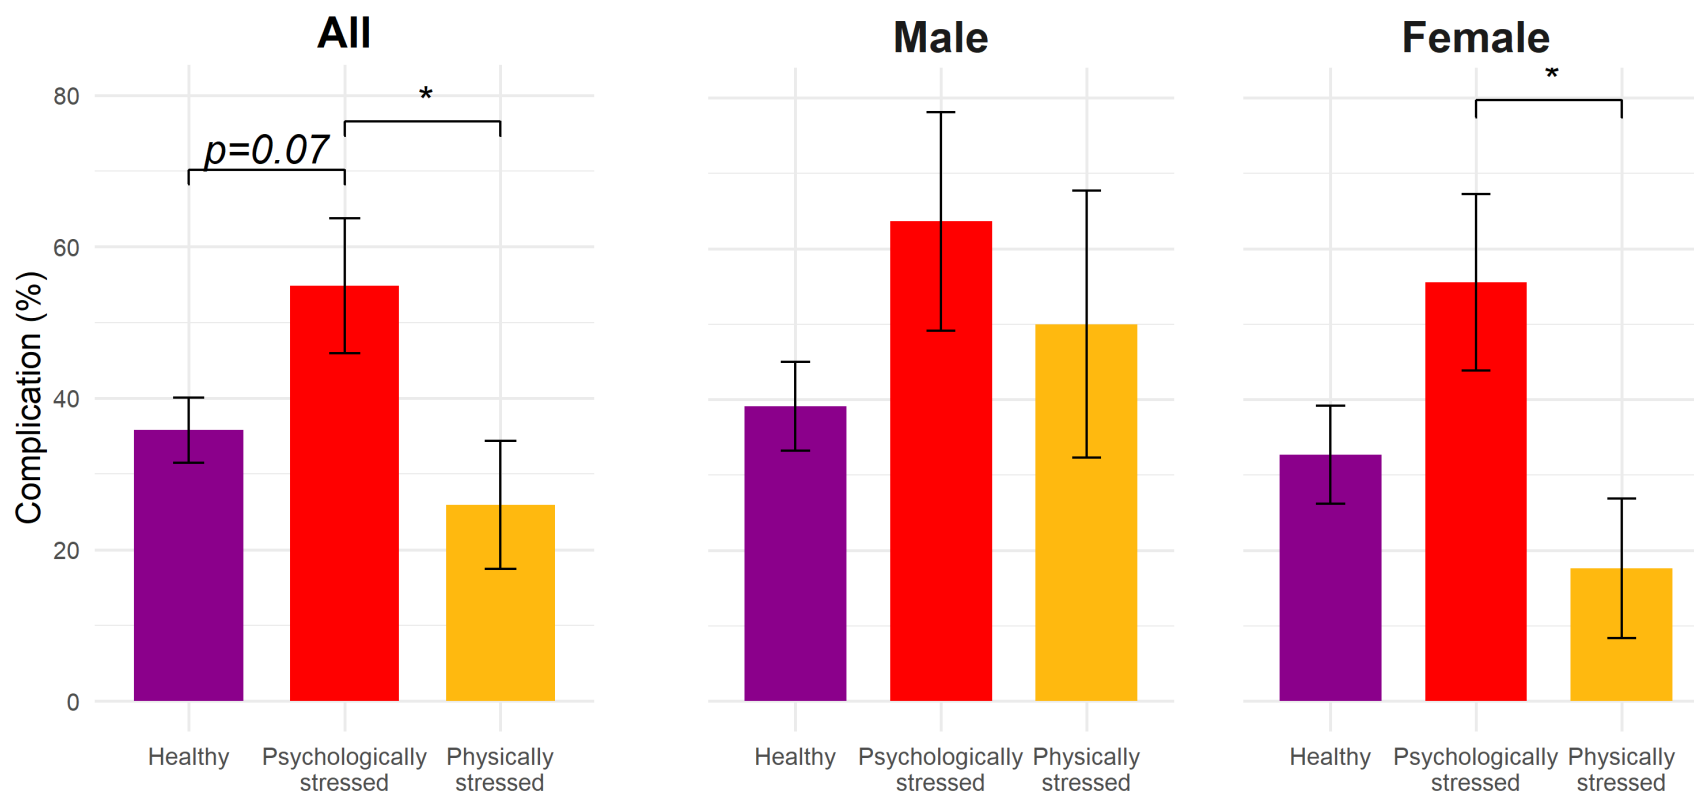

Supplementary Figure 2. Partial least squares discriminant analysis was used to evaluate the relative influence of the 27 maternal stress indicator variables in the creation of the latent profiles. Variable Importance in Projection (VIP) scores that extend to the right beyond the vertical red line are  $> 1$  and significantly differentiate the latent stress profiles. Seven variables were considered significant according to VIP scores  $> 1$ ; the top three variables depicted in navy are different elements of social support, which all have VIP scores of 2.25 and higher.

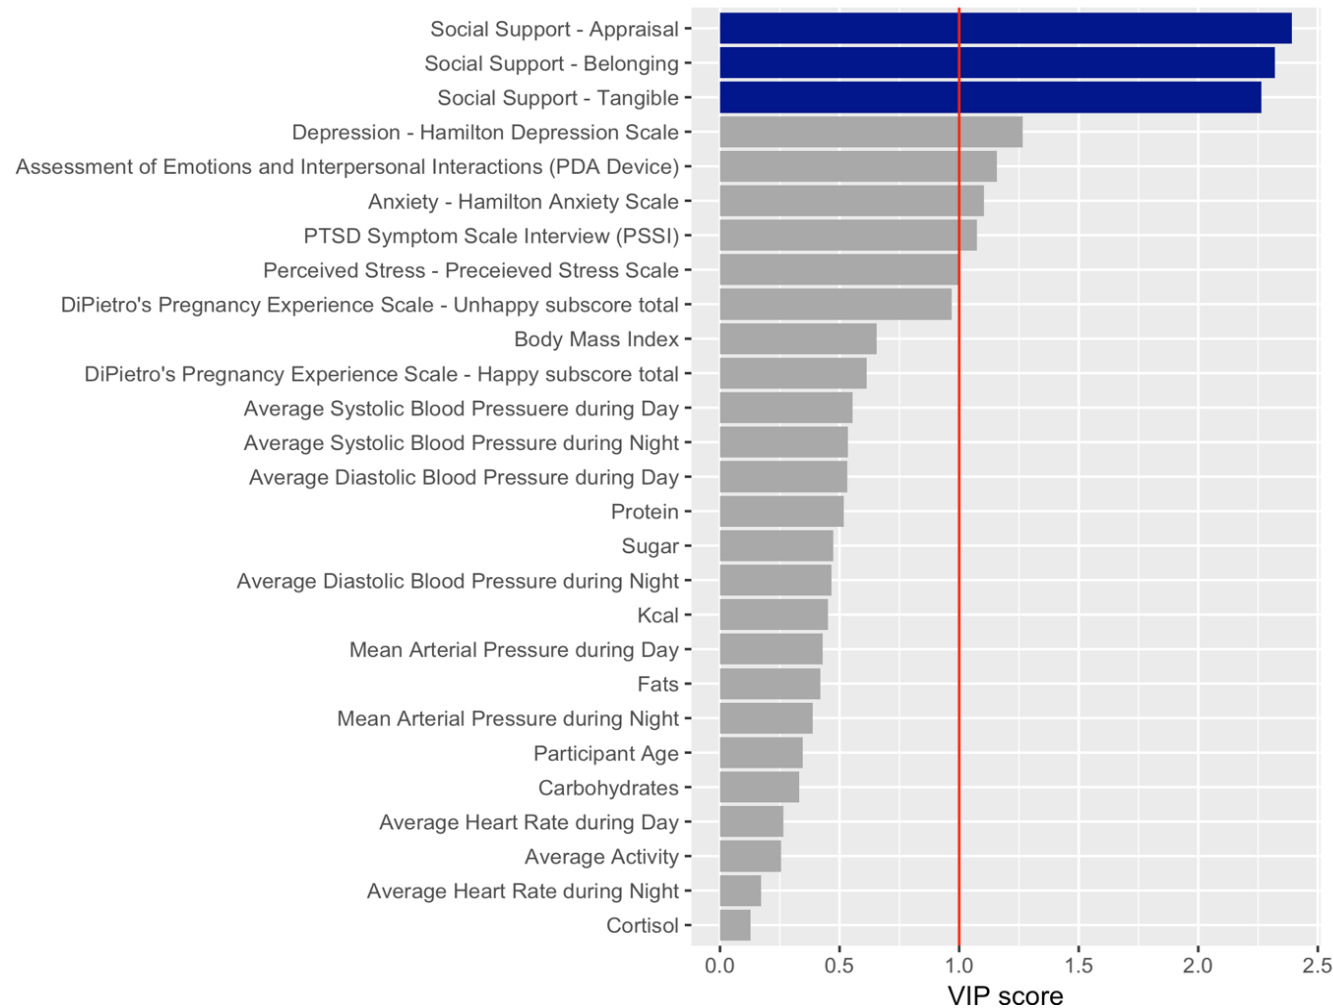

Supplementary Figure 3. To ensure that the inclusion of multiple social support variables did not overly influence the Latent Profile Analysis, we estimated a sensitivity partial least squares discriminant analysis with the composite social support score in lieu of the three separate social support variables. Variable Importance in Projection (VIP) scores that extend to the right beyond the vertical red line are  $> 1$  significantly differentiate the latent stress profiles. The social support composite score is depicted in blue.

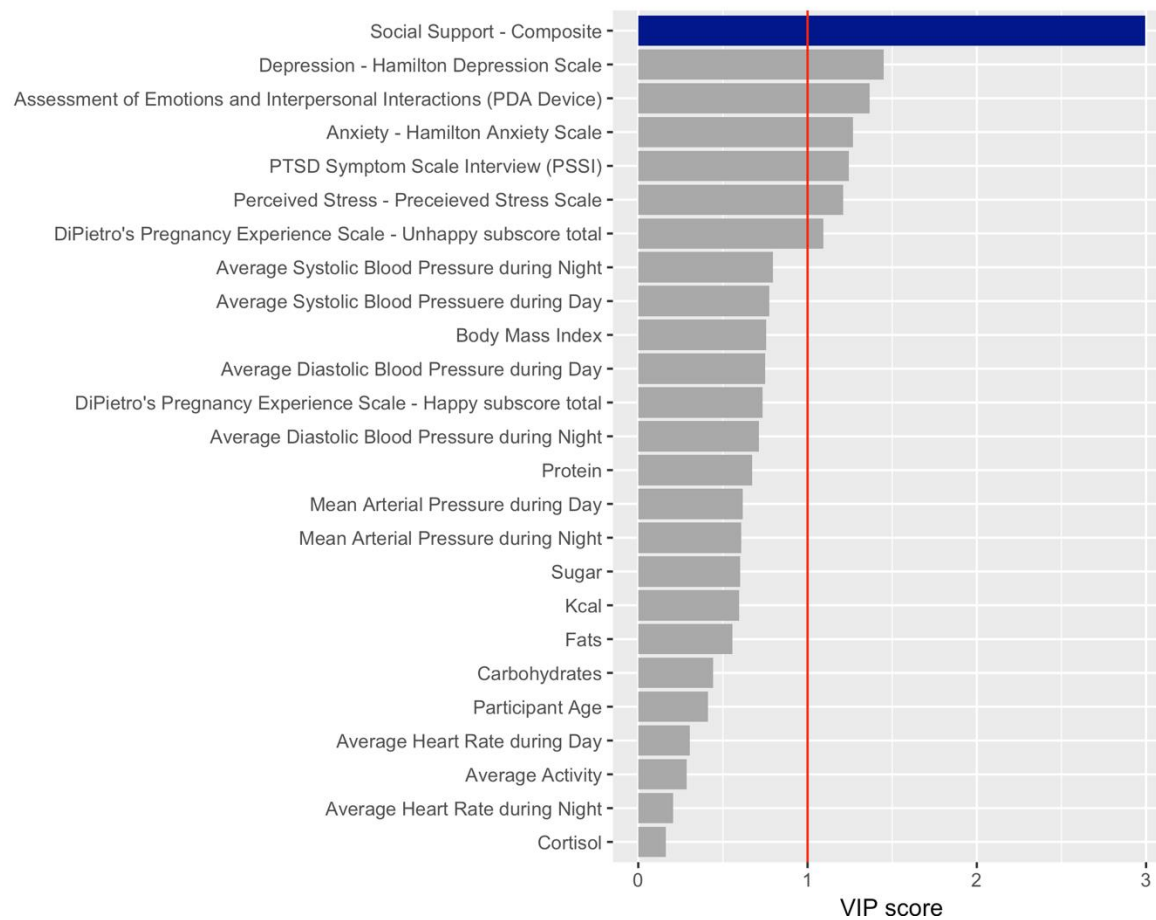

Supplementary Figure 4 – Boxplots depict individual data points and mean Appraisal, Belonging, and Tangible social support values by maternal stress profiles; 26 of 187 participants were missing social support variables.

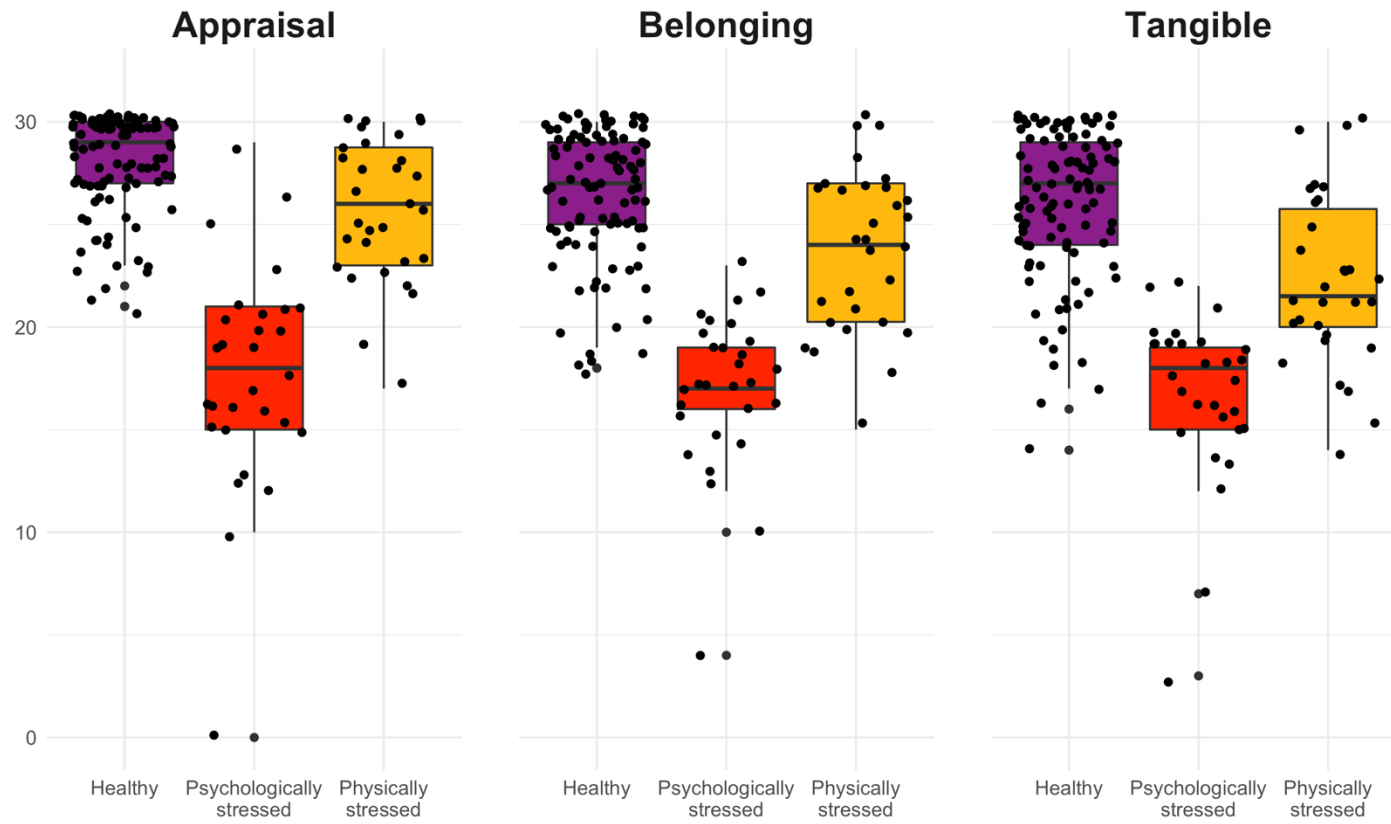

Supplementary Figure 5. Odds ratios of male fetus and their 95% confidence intervals by social support variables relative to the lowest social support levels. Each social support variable was divided by their quartiles. The ranges of the social support variables are displayed in parentheses. For belonging and tangible, higher social support was associated with greater likelihood of a male fetus being born.

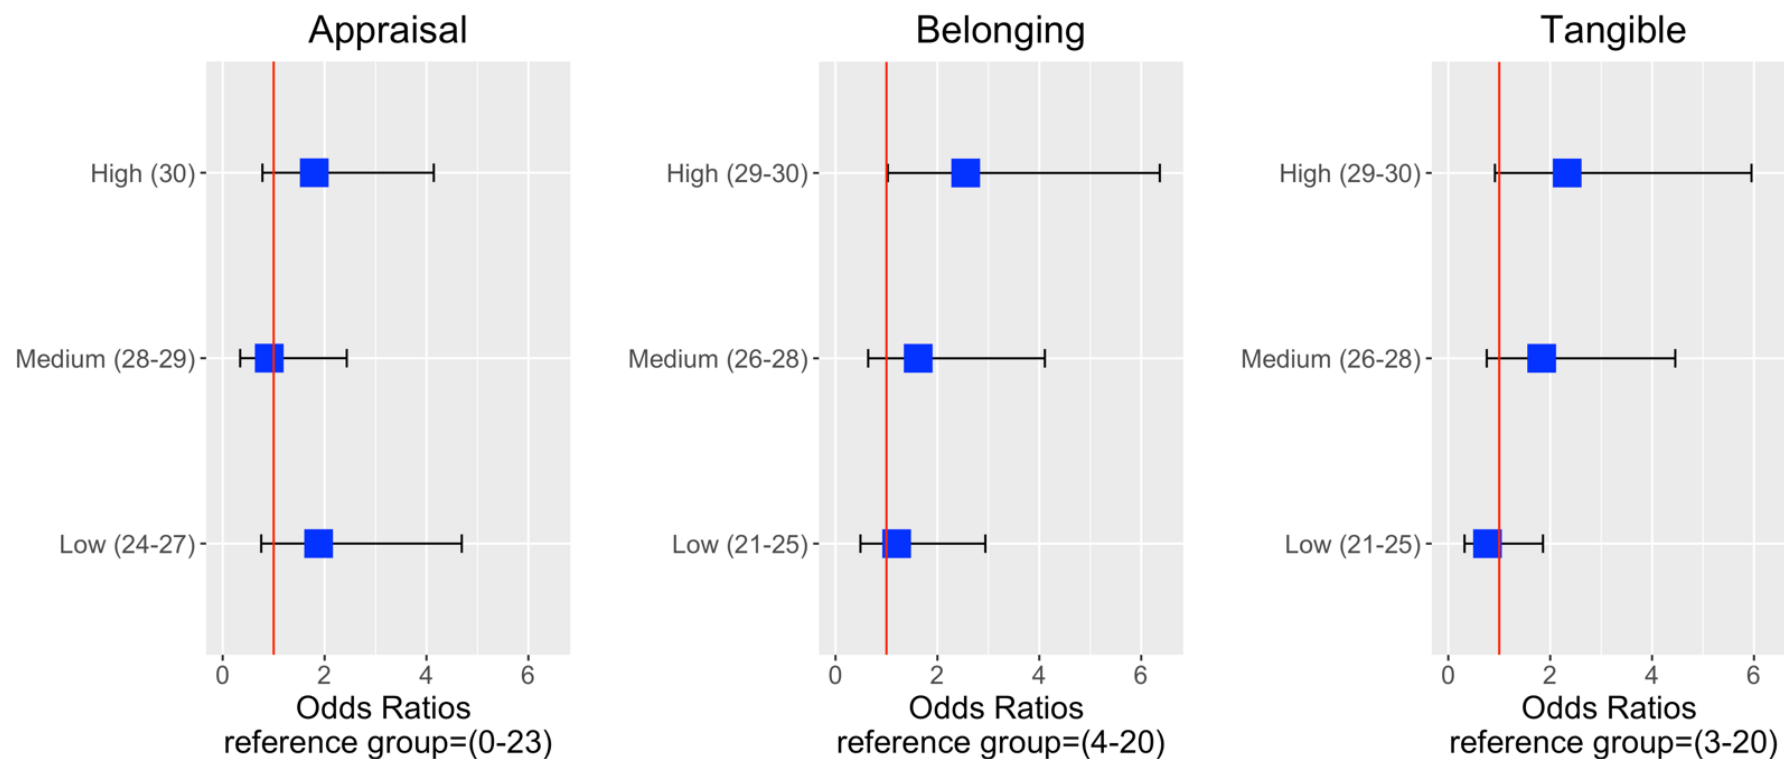

Supplement: pnas.1905890116.sapp.pdf [file pnas.1905890116.sapp.pdf]
